# Supplementary material for: The capacity of short-chain fructo-oligosaccharides to stimulate faecal bifidobacteria: a dose-response relationship study in healthy humans
Source: Springer Nature journal article supplement (doi:10.1186/1475-2891-5-8), 2006-03-28

BIFIDOBACTERIA COUNTS VARIATION  
(D15-D8) [log cfu/g]

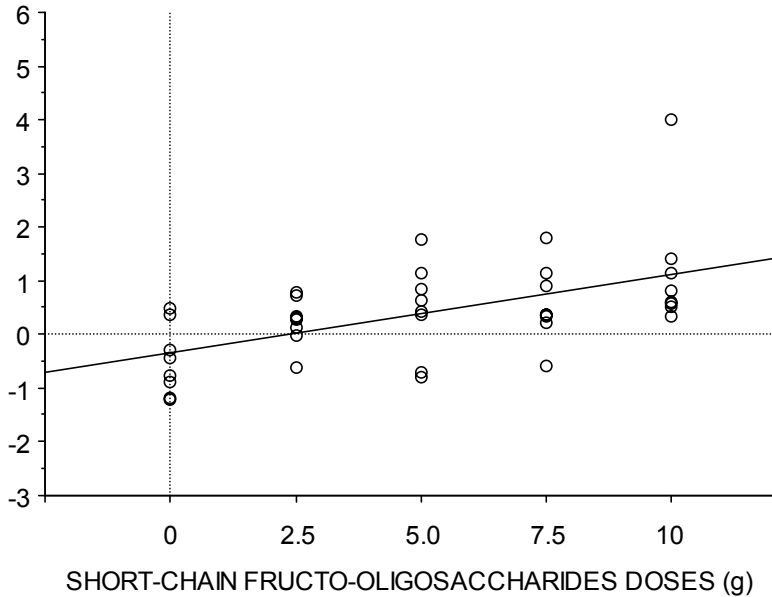

Supplement: 12937_2005_92_MOESM1_ESM.pdf [file 12937_2005_92_MOESM1_ESM.pdf]
